# Supplementary material for: The Effect of Ownership Structure on the Value of a Private Company
Source: publisher site journal article supplement (doi:10.1515/rle-2022-0030), 2022-11-01
Supplement: Supplementary file 1 [file j_rle-2022-0030_suppl.docx]

**The Effect of Ownership Structure on the Value of a Private Company**

**-**

# Supplementary Data

[Exhibit A: Court cases 2](#_Toc112753267)

[Exhibit B: Scoring table 4](#_Toc112753268)

[Exhibit C: Descriptive statistics 5](#_Toc112753269)

[Exhibit D: Fractional regression output 7](#_Toc112753270)

[Exhibit E: Robustness test (linear regression output) 8](#_Toc112753271)

# Exhibit A: Court cases

| **#** | **Date** | **Case** | **Obs.** | **Reporter** |
| --- | --- | --- | --- | --- |
| 1 | 3-May-2021 | Estate of Jackson v. Comm'r | 1 | T.C. Memo 2021-48 *; 2021 Tax Ct. Memo LEXIS 74 **; 121 T.C.M. (CCH) 1320 |
| 2 | 27-Oct-2020 | Lucero v. United States | 1 | 2020 U.S. Dist. LEXIS 199605 *; 2020 WL 6281591 |
| 3 | 10-Jun-2020 | Nelson v. Comm'r | 2 | T.C. Memo 2020-81 *; 2020 Tax Ct. Memo LEXIS 79 ** |
| 4 | 2-Mar-2020 | Grieve v. Comm'r | 2 | T.C. Memo 2020-28 *; 2020 Tax Ct. Memo LEXIS 28 ** |
| 5 | 19-Aug-2019 | Estate of Jones v. Comm'r | 2 | T.C. Memo 2019-101 *; 2019 Tax Ct. Memo LEXIS 108 ** |
| 6 | 26-Mar-2019 | Kress v. United States | 3 | 372 F. Supp. 3d 731 *; 2019 U.S. Dist. LEXIS 49850 **; 2019-1 U.S. Tax Cas. (CCH) P60,711 |
| 7 | 24-Oct-2018 | Estate of Streightoff v. Comm'r | 1 | T.C. Memo 2018-178 *; 2018 Tax Ct. Memo LEXIS 179 **; 116 T.C.M. (CCH) 437 |
| 8 | 9-Dec-2015 | Redstone v. Comm'r | 1 | T.C. Memo 2015-237 *; 2015 Tax Ct. Memo LEXIS 242 **; 110 T.C.M. (CCH) 564 |
| 9 | 11-Feb-2014 | Estate of Richmond v. Comm'r | 1 | T.C. Memo 2014-26 *; 2014 Tax Ct. Memo LEXIS 26 **; 107 T.C.M. (CCH) 1135 |
| 10 | 18-Oct-2013 | Estate of Tanenblatt v. Comm'r | 1 | T.C. Memo 2013-263 *; 2013 Tax Ct. Memo LEXIS 273 ** |
| 11 | 8-Apr-2013 | Estate of Koons v. Comm'r | 1 | T.C. Memo 2013-94 *; 2013 Tax Ct. Memo LEXIS 98 **; 105 T.C.M. (CCH) 1567 |
| 12 | 7-Feb-2013 | Estate of Kite v. Comm'r | 1 | T.C. Memo 2013-43 *; 2013 Tax Ct. Memo LEXIS 43 **; 105 T.C.M. (CCH) 1277 |
| 13 | 28-Jun-2011 | Estate of Gallagher v. Comm'r | 1 | 2011 Tax Ct. Memo LEXIS 150 *; T.C. Memo 2011-148; 101 T.C.M. (CCH) 1702 |
| 14 | 22-Jun-2011 | Estate of Giustina v. Comm'r | 1 | 2011 Tax Ct. Memo LEXIS 141 *; T.C. Memo 2011-141; 101 T.C.M. (CCH) 1676 |
| 15 | 13-May-2010 | Pierre v. Comm'r | 1 | 2010 Tax Ct. Memo LEXIS 143 *; T.C. Memo 2010-106; 99 T.C.M. (CCH) 1436 |
| 16 | 2-Oct-2009 | Estate of Murphy v. United States | 3 | 2009 U.S. Dist. LEXIS 94923 *; 2009-2 U.S. Tax Cas. (CCH) P60,583; 104 A.F.T.R.2d (RIA) 2009-7703 |
| 17 | 29-Jan-2009 | Estate of Marjorie deGreeff Litchfield v. Comm'r | 2 | 2009 Tax Ct. Memo LEXIS 21 *; T.C. Memo 2009-21; 97 T.C.M. (CCH) 1079 |
| 18 | 22-Jul-2008 | Bergquist v. Comm'r | 2 | 131 T.C. 8 *; 2008 U.S. Tax Ct. LEXIS 20 **; 131 T.C. No. 2 |
| 19 | 27-May-2008 | Holman v. Comm'r | 3 | 130 T.C. 170 *; 2008 U.S. Tax Ct. LEXIS 12 **; 130 T.C. No. 12 |
| 20 | 5-May-2008 | Astleford v. Comm'r | 3 | 2008 Tax Ct. Memo LEXIS 129 *; T.C. Memo 2008-128; 95 T.C.M. (CCH) 1497 |
| 21 | 28-Sep-2006 | Dallas v. Comm'r | 2 | 2006 Tax Ct. Memo LEXIS 216 *; T.C. Memo 2006-212; 92 T.C.M. (CCH) 313 |
| 22 | 9-May-2006 | Huber v. Comm'r | 1 | 2006 Tax Ct. Memo LEXIS 97 *; T.C. Memo 2006-96; 91 T.C.M. (CCH) 1132; RIA TM 56510 |
| 23 | 10-Mar-2006 | Temple v. United States | 4 | 423 F. Supp. 2d 605 *; 2006 U.S. Dist. LEXIS 16171 **; 2006-1 U.S. Tax Cas. (CCH) P60,523; 97 A.F.T.R.2d (RIA) 2006-1649 |
| 24 | 11-Oct-2005 | Estate of Kelley v. Comm'r | 1 | 2005 Tax Ct. Memo LEXIS 236 *; T.C. Memo 2005-235; 90 T.C.M. (CCH) 369 |
| 25 | 31-May-2005 | Estate of Jelke v. Comm'r | 1 | 2005 Tax Ct. Memo LEXIS 128 *; T.C. Memo 2005-131; 89 T.C.M. (CCH) 1397 |
| 26 | 15-Mar-2005 | Estate of Bongard v. Comm'r | 2 | 124 T.C. 95 *; 2005 U.S. Tax Ct. LEXIS 8 **; 124 T.C. No. 8 |
| 27 | 26-Jul-2004 | Estate of Thompson v. Comm'r | 1 | 499 F.3d 129 *; 2007 U.S. App. LEXIS 20066 **; 2007-2 U.S. Tax Cas. (CCH) P60,546; 100 A.F.T.R.2d (RIA) 2007-5792 |
| 28 | 29-Dec-2003 | Estate of Green v. Comm'r | 1 | 2003 Tax Ct. Memo LEXIS 348 *; T.C. Memo 2003-348; 86 T.C.M. (CCH) 758; RIA TM 55384 |
| 29 | 25-Sep-2003 | Peracchio v. Comm'r | 1 | 2003 Tax Ct. Memo LEXIS 279 *; T.C. Memo 2003-280; 86 T.C.M. (CCH) 412 |
| 30 | 3-Sep-2003 | Lappo v. Comm'r | 2 | 2003 Tax Ct. Memo LEXIS 257 *; T.C. Memo 2003-258; 86 T.C.M. (CCH) 333 |
| 31 | 20-Aug-2003 | Hess v. Comm'r | 1 | 2003 Tax Ct. Memo LEXIS 250 *; T.C. Memo 2003-251; 86 T.C.M. (CCH) 303 |
| 32 | 13-Jun-2003 | Estate of Deputy v. Comm'r | 1 | 2003 Tax Ct. Memo LEXIS 174 *; T.C. Memo 2003-176; 85 T.C.M. (CCH) 1497 |
| 33 | 14-May-2003 | McCord v. Comm'r | 1 | 120 T.C. 358 *; 2003 U.S. Tax Ct. LEXIS 16 **; 120 T.C. No. 13 |
| 34 | 23-Aug-2002 | Okerlund v. United States | 2 | 53 Fed. Cl. 341 *; 2002 U.S. Claims LEXIS 221 **; 2002-2 U.S. Tax Cas. (CCH) P60,447; 90 A.F.T.R.2d (RIA) 2002-6124 |
| 35 | 1-Aug-2002 | Dunn v. Comm’r | 1 | 301 F.3d 339 *; 2002 U.S. App. LEXIS 15453 **; 59 Fed. R. Serv. 3d (Callaghan) 529 |
| 36 | 17-Jun-2002 | Estate of Bailey v. Comm'r | 1 | 2002 Tax Ct. Memo LEXIS 159 *; T.C. Memo 2002-152; 83 T.C.M. (CCH) 1862; T.C.M. (RIA) 54788 |
| 37 | 9-Apr-2002 | Estate of Mitchell v. Comm'r | 1 | 2002 Tax Ct. Memo LEXIS 100 *; T.C. Memo 2002-98; 83 T.C.M. (CCH) 1524; T.C.M. (RIA) 54715 |
| 38 | 5-Feb-2002 | Estate of Heck v. Comm'r | 1 | 2002 Tax Ct. Memo LEXIS 38 *; T.C. Memo 2002-34; 83 T.C.M. (CCH) 1181; T.C.M. (RIA) 54639 |
| 39 | 3-Oct-2001 | Estate of Elma Middleton Dailey v. Comm’r | 2 | 2001 Tax Ct. Memo LEXIS 299 *; T.C. Memo 2001-263; 82 T.C.M. (CCH) 710 |
| 40 | 24-Aug-2001 | Adams v. United States | 1 | 2001 U.S. Dist. LEXIS 13092 *; 2001-2 U.S. Tax Cas. (CCH) P60,418; 88 A.F.T.R.2d (RIA) 2001-6057 |
| 41 | 6-Jul-2001 | Estate of H.A. True v. Comm’r | 9 | 2001 Tax Ct. Memo LEXIS 199 *; T.C. Memo 2001-167; 82 T.C.M. (CCH) 27 |
| 42 | 9-May-2001 | Estate of Marcia P. Hoffman v. Comm’r | 1 | 2001 Tax Ct. Memo LEXIS 136 *; T.C. Memo 2001-109; 81 T.C.M. (CCH) 1588 |
| 43 | 27-Mar-2001 | Wall v. Comm’r | 1 | 2001 Tax Ct. Memo LEXIS 97 *; T.C. Memo 2001-75; 81 T.C.M. (CCH) 1425 |
| 44 | 6-Mar-2001 | Estate of Jones v. Comm’r | 2 | 116 T.C. 121 *; 2001 U.S. Tax Ct. LEXIS 11 **; 116 T.C. No. 10; 116 T.C. No. 11 |
| 45 | 2-Feb-2001 | Janda v. Comm’r | 1 | 2001 Tax Ct. Memo LEXIS 34 *; T.C. Memo 2001-24; 81 T.C.M. (CCH) 1100; T.C.M. (RIA) 54231 |
| 46 | 30-Nov-2000 | Knight v. Comm’r | 1 | 115 T.C. 506 *; 2000 U.S. Tax Ct. LEXIS 88 **; 115 T.C. No. 36 |
| 47 | 18-Aug-2000 | Estate of Borgatello v. Comm’r | 1 | 2000 Tax Ct. Memo LEXIS 309 *; T.C. Memo 2000-264; 80 T.C.M. (CCH) 260; T.C.M. (RIA) 54013 |
| 48 | 4-Aug-2000 | Godley v. Comm’r | 4 | 2000 Tax Ct. Memo LEXIS 284 *; T.C. Memo 2000-242; 80 T.C.M. (CCH) 158; T.C.M. (RIA) 53984 |
| 49 | 27-Jun-2000 | Estate of Klauss v. Comm’r | 1 | 2000 Tax Ct. Memo LEXIS 228 *; T.C. Memo 2000-191; 79 T.C.M. (CCH) 2177; T.C.M. (RIA) 53923 |
| 50 | 11-Apr-2000 | Estate of Maggos v. Comm’r | 1 | 2000 Tax Ct. Memo LEXIS 154 *; T.C. Memo 2000-129; 79 T.C.M. (CCH) 1861 |
| 51 | 20-Mar-2000 | Gow v. Comm’r | 4 | 2000 Tax Ct. Memo LEXIS 108 *; T.C. Memo 2000-93; 79 T.C.M. (CCH) 1680 |
| 52 | 15-Feb-2000 | Estate of Weinberg v. Comm’r | 1 | 2000 Tax Ct. Memo LEXIS 58 *; T.C. Memo 2000-51; 79 T.C.M. (CCH) 1507 |
| 53 | 5-Nov-1999 | Estate of Smith v. Comm’r | 2 | 1999 Tax Ct. Memo LEXIS 425 *; T.C. Memo 1999-368; 78 T.C.M. (CCH) 745 |
| 54 | 14-Oct-1999 | Estate of Marmaduke v. Comm’r | 2 | 1999 Tax Ct. Memo LEXIS 397 *; T.C. Memo 1999-342; 78 T.C.M. (CCH) 590 |
| 55 | 23-Aug-1999 | Estate of Hendrickson v. Comm’r | 1 | 1999 Tax Ct. Memo LEXIS 318 *; T.C. Memo 1999-278; 78 T.C.M. (CCH) 322; T.C.M. (RIA) 99278 |
| 56 | 29-Jul-1999 | Gross v. Comm’r | 1 | 1999 Tax Ct. Memo LEXIS 290 *; T.C. Memo 1999-254; 78 T.C.M. (CCH) 201; T.C.M. (RIA) 99254 |
| 57 | 10-Mar-1999 | Desmond v. Comm’r | 1 | 1999 Tax Ct. Memo LEXIS 84 *; T.C. Memo 1999-76; 77 T.C.M. (CCH) 1529; T.C.M. (RIA) 99076 |
| 58 | 17-Nov-1998 | Barnes v. Comm’r | 2 | 1998 Tax Ct. Memo LEXIS 410 *; T.C. Memo 1998-413; 76 T.C.M. (CCH) 881; T.C.M. (RIA) 98413 |
| 59 | 8-Aug-1998 | King v. Comm’r  (Estate of Brookshire) | 1 | 1998 Tax Ct. Memo LEXIS 370 *; T.C. Memo 1998-365; 76 T.C.M. (CCH) 659 |
| 60 | 30-Jun-1998 | Estate of Davis v. Comm’r | 1 | 110 T.C. 530 *; 1998 U.S. Tax Ct. LEXIS 35 **; 110 T.C. No. 35 |
| 61 | 30-Apr-1998 | Furman v. Comm’r | 2 | 1998 Tax Ct. Memo LEXIS 158 *; T.C. Memo 1998-157; 75 T.C.M. (CCH) 2206 |
| 62 | 19-Mar-1998 | Dockery v. Comm’r | 2 | 1998 Tax Ct. Memo LEXIS 114 *; T.C. Memo 1998-114; 75 T.C.M. (CCH) 2032 |
| 63 | 27-Oct-1997 | Estate of Fleming v. Comm’r | 1 | 1997 Tax Ct. Memo LEXIS 566 *; T.C. Memo 1997-484; 74 T.C.M. (CCH) 1049; 3 U.S. Tax Cas. (CCH) P45,035 |
| 64 | 5-Feb-1997 | Gray v. Comm’r | 1 | 1997 Tax Ct. Memo LEXIS 66 *; T.C. Memo 1997-67; 73 T.C.M. (CCH) 1940 |
| 65 | 26-Aug-1996 | Estate of Barudin v. Comm’r | 1 | 1996 Tax Ct. Memo LEXIS 403 *; T.C. Memo 1996-395; 72 T.C.M. (CCH) 488 |
| 66 | 11-Mar-1996 | Kosman v. Comm’r | 3 | 1996 Tax Ct. Memo LEXIS 107 *; T.C. Memo 1996-112; 71 T.C.M. (CCH) 2356 |
| 67 | 4-Dec-1995 | Wheeler v. United States | 1 | 1995 U.S. Dist. LEXIS 21432 *; 77 A.F.T.R.2d (RIA) 96-1405 |
| 68 | 7-Aug-1995 | Estate of McCormick v. Comm’r | 4 | 1995 Tax Ct. Memo LEXIS 367 *; T.C. Memo 1995-371; 70 T.C.M. (CCH) 318 |
| 69 | 12-Jun-1995 | Mandelbaum v. Comm’r | 1 | 1995 Tax Ct. Memo LEXIS 256 *; T.C. Memo 1995-255; 69 T.C.M. (CCH) 2852 |
| 70 | 28-Mar-1995 | Estate of Frank v. Comm’r | 1 | 1995 Tax Ct. Memo LEXIS 178 *; T.C. Memo 1995-132; 69 T.C.M. (CCH) 2255 |
| 71 | 27-Oct-1994 | Estate of Luton v. Comm’r | 2 | 1994 Tax Ct. Memo LEXIS 550 *; T.C. Memo 1994-539; 68 T.C.M. (CCH) 1044 |
| 72 | 19-Oct-1994 | Estate of Lauder v. Comm’r | 1 | 1994 Tax Ct. Memo LEXIS 535 *; T.C. Memo 1994-527; 68 T.C.M. (CCH) 985 |
| 73 | 11-May-1994 | Estate of Simpson v. Comm’r | 2 | 1994 Tax Ct. Memo LEXIS 217 *; T.C. Memo 1994-207; 67 T.C.M. (CCH) 2938 |
| 74 | 8-Dec-1993 | Estate of Ford v. Comm’r | 6 | 1993 Tax Ct. Memo LEXIS 595 *; T.C. Memo 1993-580; 66 T.C.M. (CCH) 1507 |
| 75 | 10-Nov-1993 | Estate of Jung v. Comm’r | 1 | 101 T.C. 412 *; 1993 U.S. Tax Ct. LEXIS 69 **; 101 T.C. No. 28 |
| 76 | 1-Feb-1993 | Estate of Bennett v. Comm’r | 1 | 1993 Tax Ct. Memo LEXIS 47 *; T.C. Memo 1993-34; 65 T.C.M. (CCH) 1816 |
| 77 | 30-Aug-1990 | Estate of Murphy v. Comm’r | 1 | 1990 Tax Ct. Memo LEXIS 520 *; T.C. Memo 1990-472; 60 T.C.M. (CCH) 645; T.C.M. (RIA) 90472 |
| 78 | 1-Aug-1990 | Estate of Lenheim v. Comm’r | 5 | 1990 Tax Ct. Memo LEXIS 420 *; T.C. Memo 1990-403; 60 T.C.M. (CCH) 356; T.C.M. (RIA) 90403 |
| 79 | 31-May-1990 | Estate of Dougherty v. Comm’r | 1 | 1990 Tax Ct. Memo LEXIS 292 *; T.C. Memo 1990-274; 59 T.C.M. (CCH) 772; T.C.M. (RIA) 90274 |
| 80 | 28-Feb-1990 | Estate of Newhouse v. Comm’r | 1 | 94 T.C. 193 *; 1990 U.S. Tax Ct. LEXIS 9 **; 94 T.C. No. 14 |
|  | TOTAL NUMBER OF OBSERVATIONS | | **137** |  |

# Exhibit B: Scoring table

| Open (+1) | Undecided (0) | Closed (-1) |
| --- | --- | --- |
| intuitu pecuniae << Legal form of the entity >> intuitu personae | | |
| no << Material transfer restrictions >> yes  (material means ≥ 60 days transfer restriction or preemption at reduced price) | | |
| ≥ 5 including non-family  << Number of and relation between shareholders >> < 5 or family related | | |
| yes << Stated or implicit intent of the owners to expand shareholder base >> no | | |

This scoring table was used as a default decision rule to determine whether a company is open to external shareholders. In cases where there is no judicial finding or evidence of prior or proposed arm’s length transactions, four decision elements are applied to decide whether a company should be categorized as “open” or “closed”:

(1) The legal form of the entity: *Intuitu pecuniae* entity forms, also known as companies of capital (i.e., corporations), focus on capital investment rather than on the identity or personal qualities of partners and investors. These forms tend to be more “open” than *intuitu personae* legal entities, also called companies of persons (i.e. partnerships), where the emphasis is on the identity and quality of the shareholders/partners (“closed”). Hybrid forms such as the limited liability company have features of both intuitu pecuniae and intuitu personae entity forms. These “mixed” entities have been categorized as undecided in our analysis.

(2) The existence of material transfer restrictions: Transfer restrictions can give an indication as to how open a legal entity is to external shareholders. We considered transfer restrictions to be material when they block (delay) transfers for a period of 60 days or more, and/or when they imply a preemption right at a reduced price. The presence of material transfer restrictions is indicative of a “closed” company. Companies with transfer restrictions that do not meet the above-mentioned criteria have been categorized as open. The cases where there is no information about transfer restrictions have been recorded as “undecided”.

(3) The number of and relation between shareholders: A circle of shareholders that is limited to a few people (< 5) or to family shareholders may indicate that an entity is not open to new classes of shareholders. A shareholding above these limits is considered to be indicative of an open company. In the absence of any information on the shareholding, the matter was recorded as “undecided”.

(4) The stated or implicit intent of the shareholders to expand the shareholder base: The language of the court might indicate whether the owners of a legal entity envisage opening up the shareholder base to newcomers (“open”) or conversely, that the entity will remain “closed”. In the absence of any indication, the matter is “undecided”.

Each decision element was given the same weight, and a company is considered “closed” only if a majority of the decision criteria (not taking into account the “undecided” elements) are categorized as such. In the case of a tie, the company was considered to be “open.”

# Exhibit C: Descriptive statistics

1. **Dependent variable (DLOM)**

| N | Range | Minimum | Maximum | Mean | Std. Deviation |
| --- | --- | --- | --- | --- | --- |
| 137 | 50.00 | 0.00 | 50.00 | 23.75 | 8.8656 |

These numbers include cases for which a conflated discount (i.e., a combined DLOM and DLOC) was decided and for which a proportional allocation has been made based on our sample averages. There are no missing values. A QQ-plot and a Shapiro-Wilk test confirm that the DLOM is normally distributed.

1. **Independent variable**

We report descriptive statistics for the main independent variable below.

| Categorical variables | 1 | 0 | Missing | Total (N) |
| --- | --- | --- | --- | --- |
| V_OPEN | 79 | 58 | 0 | 137 |

1. **Control variables**

We report key statistics for the continuous and categorical control variables below. The missing information corresponds to the cases and observations for which there is no information available or for which the independent reviewers came to conflicting conclusions.

The regression results have been checked on absence of multicollinearity. This situation occurs when the predictor variables are highly correlated with each other; in this case, the regression model would not be able to accurately associate variance in the outcome variable with the correct predictor variable, leading to muddled results and incorrect inferences. Multicollinearity has been checked using the variance inflation factor values (not reported).

| Continuous variables | N | Minimum | Maximum | Mean | SD | Missing | Replacement |
| --- | --- | --- | --- | --- | --- | --- | --- |
| V_SIZE(log) | 137 | 0.198 | 3149.63 | 120.33 | 372.16 | 5 | 120.33 |
| V_SIZE_INTEREST | 137 | 0.12 | 100 | 35.84 | 28.20 | 4 | 35.84 |
| V_SPREAD | 137 | 3.28 | 200 | 64.23 | 34.61 | 8 | 64.23 |
| V_SHAREHOLDERS | 137 | 1 | 20 | 5 | 5.27 | 30 | 5 |

The median of the original 107 available observations for the number of shareholders is 5 and we cap 13 outliers to 20. After truncating, the mean and median are equal to 5.

| Categorical variables | 1 | 0 | Missing | Total (N) |
| --- | --- | --- | --- | --- |
| V_AUDIT | 22 | 115 | 0 | 137 |
| V_DIVERSIFIED | 42 | 93 | 2 | 137 |
| V_PROFITABILITY | 117 | 14 | 6 | 137 |
| V_INDUSTRY_H | 76 | 61 | 0 | 137 |

| Division | Industry | SIC range | Number of observations |
| --- | --- | --- | --- |
| A | Agriculture, Forestry, & Fishing | 01-09 | 7 |
| B | Mining | 10-14 | 2 |
| C | Construction | 15-17 | 4 |
| D | Manufacturing | 20-39 | 14 |
| E | Transportation & Public Utilities | 40-49 | 9 |
| F | Wholesale Trade | 50-51 | 5 |
| G | Retail Trade | 52-59 | 8 |
| H | Finance, Insurance, & Real Estate | 60-67 | 76 |
| I | Services | 70-89 | 12 |
| J | Public Administration | 91-98 | 0 |
| K | Non classifiable Establishments | 99 | 0 |
| TOTAL | | | 137 |

# Exhibit D: Fractional regression output

We have constructed a fractional regression analysis following the method set out by Clark (2019). Fractional regression is a form of logistic regression, whereby the parameters α and β are essentially estimated from the nonlinear equation . We report the key output below.

1. **Simple fractional regression**

The table below shows the point estimations of DLOM under the fractional regression model with a two-sided confidence interval of 95%.

| DLOM | Estimated value | Lower | Upper |
| --- | --- | --- | --- |
| Closed | 0.2750 | 0.2532 | 0.2979 |
| Open | 0.2100 | 0.1930 | 0.2280 |
| p-value : 0.0000  R-squared : 0.1325 | | | |

1. **Fractional regression with control variables**

The table below shows the fractional regression results for the model including control variables.

| Variable | Estimate | Std. Error | t-value | p-value |
| --- | --- | --- | --- | --- |
| Intercept | -0.88809 | 0.20600 | -4.31113 | 0.00003 |
| V_OPEN | -0.33384 | 0.08049 | -4.14779 | 0.00006 |
| V_SIZE(log) | 0.00119 | 0.02365 | 0.05043 | 0.95986 |
| V_INDUSTRY_H | -0.26224 | 0.08551 | -3.06666 | 0.00267 |
| V_AUDIT | 0.13477 | 0.10251 | 1.31469 | 0.19110 |
| V_PROFITABILITY | 0.02237 | 0.12878 | 0.17370 | 0.86239 |
| V_DIVERSIFIED | -0.02415 | 0.08716 | -0.27712 | 0.78216 |
| V_SIZE_INTEREST | -0.00087 | 0.00153 | -0.56804 | 0.57106 |
| V_SPREAD | -0.00027 | 0.00121 | -0.21994 | 0.82629 |
| V_SHAREHOLDERS | 0.01021 | 0.00713 | 1.43156 | 0.15485 |
| R-squared: 0.2888 | | | | |

# Exhibit E: Robustness test (linear regression output)

As outlined in the body text, our dataset contains 20 conflated discounts (i.e., discount percentages that reflect a combined DLOC and DLOM). In the main analysis, the conflated discounts have been proportionally allocated over the DLOC and the DLOM. As a robustness test, we report below the linear regression results for a dataset in which the 20 conflated discounts have been omitted.

1. **Linear regression with two-sided 95% Confidence Interval**

| DLOM | Estimated value | Lower | Upper |
| --- | --- | --- | --- |
| Closed | 0.2838 | 0.2598 | 0.3079 |
| Open | 0.2083 | 0.1878 | 0.2287 |
| p-value: 0.0000  Adjusted R-squared: 0.1566 | | | |

1. **Linear regression with control variables**

| Variable | Estimate | Std. Error | t-value | p-value |
| --- | --- | --- | --- | --- |
| Intercept | 0.29549 | 0.04119 | 7.17441 | 0.00000 |
| V_OPEN | -0.06799 | 0.01688 | -4.02701 | 0.00011 |
| V_SIZE(log) | 0.00064 | 0.00470 | 0.13683 | 0.89143 |
| V_INDUSTRY_H | -0.04843 | 0.01752 | -2.76472 | 0.00674 |
| V_AUDIT | 0.02448 | 0.02105 | 1.16297 | 0.24750 |
| V_PROFITABILITY | 0.00346 | 0.02563 | 0.13483 | 0.89301 |
| V_DIVERSIFIED | -0.00052 | 0.01786 | -0.02927 | 0.97671 |
| V_SIZE_INTEREST | -0.00016 | 0.00031 | -0.50741 | 0.61294 |
| V_SPREAD | -0.00015 | 0.00026 | -0.56040 | 0.57641 |
| V_SHAREHOLDERS | 0.00249 | 0.00151 | 1.64418 | 0.10316 |
| Multiple R-squared: 0.3011  Adjusted R-squared: 0.2406 | | | | |
